# Supplementary material
Source: PubMed Central journal article supplement (PMC5802342)
Supplement: NIHMS925467-supplement-Suppl_Figures.pdf [file NIHMS925467-supplement-Suppl_Figures.pdf]

**Supplementary Figure 1**

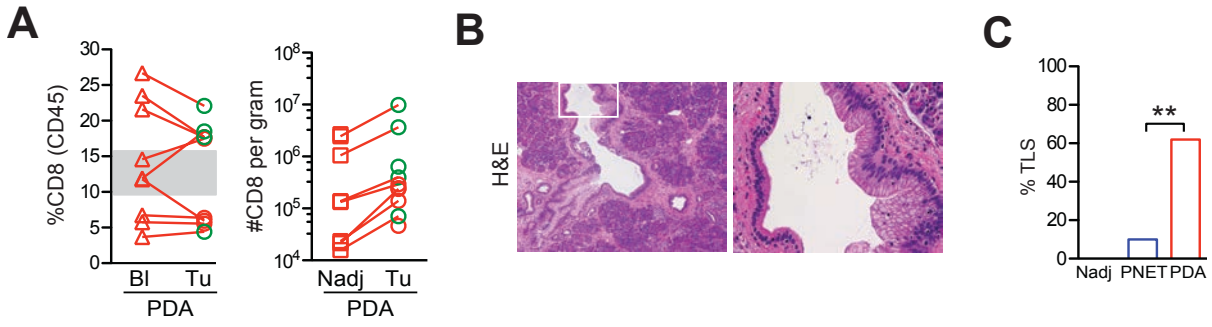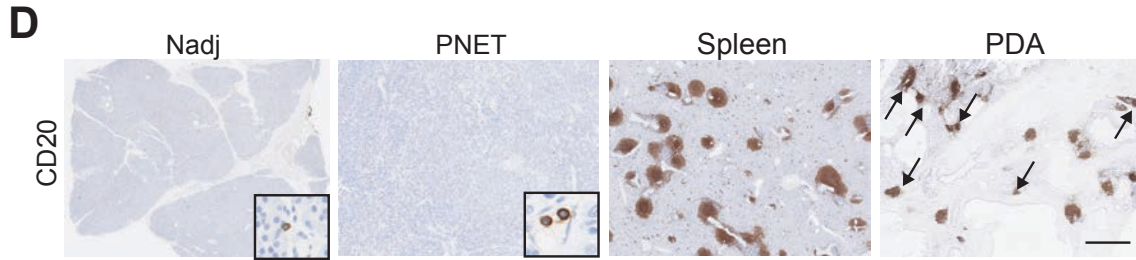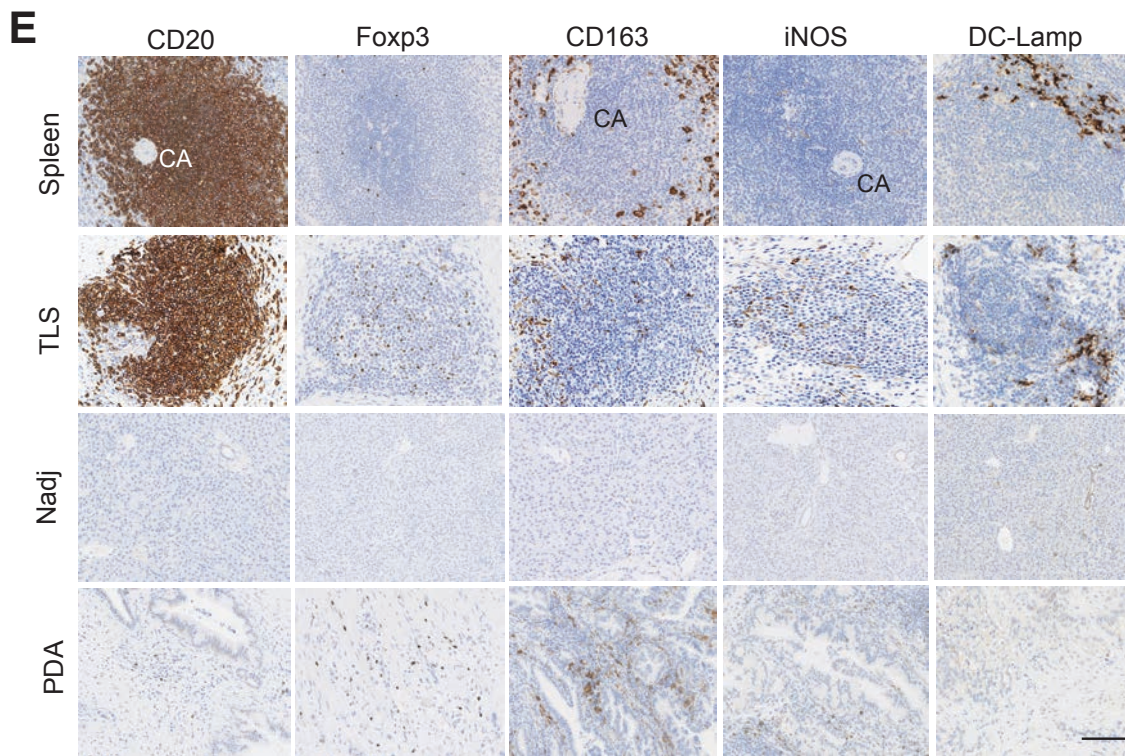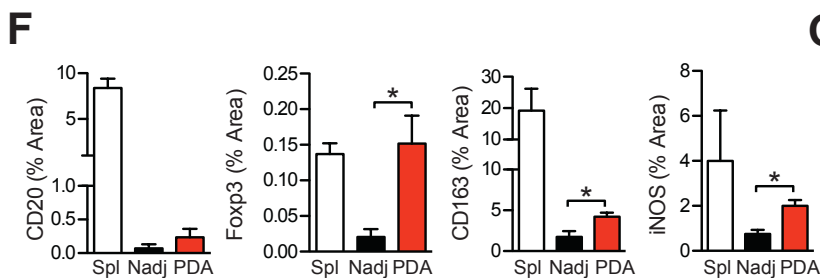

**Supplementary Figure 1.** TLS composition and immune features of human PDA. **A**, CD8 T cell frequency and number was determined by flow cytometry. Green circles indicate TLS<sup>+</sup> tumors. Grey box (left panel) demarcates T cell frequency range in blood that does not directly correlate with T cell frequency in tumors. **B**, Example of a preinvasive intraepithelial lesion in Nadj pancreas obtained from a resected patient sample. **C**, Frequency of TLS in Nadj pancreas, PNET and PDA specimens. **D**, CD20 staining of Nadj pancreas, PNET, spleen and PDA demarcate TLS. Inset, rare CD20<sup>+</sup> B cells in Nadj pancreas and spleen. Arrows, TLS. Scale bar represents 100 μm. **E**, Cellular composition of lymphoid follicles in spleen and tumoral TLS. CA, central arteriole. Scale bar represents 25 μm. **F**, Quantification of IHC staining from Supplementary Figure 1E and was determined by digital analysis of scanned slides. Spl, spleen. **G**, Example of a TLS associated with cytokeratin (CK)<sup>+</sup> tumor cells and surrounded by αSMA<sup>+</sup> fibroblasts. Scale bar represents 25 μm.

## Supplementary Figure 2

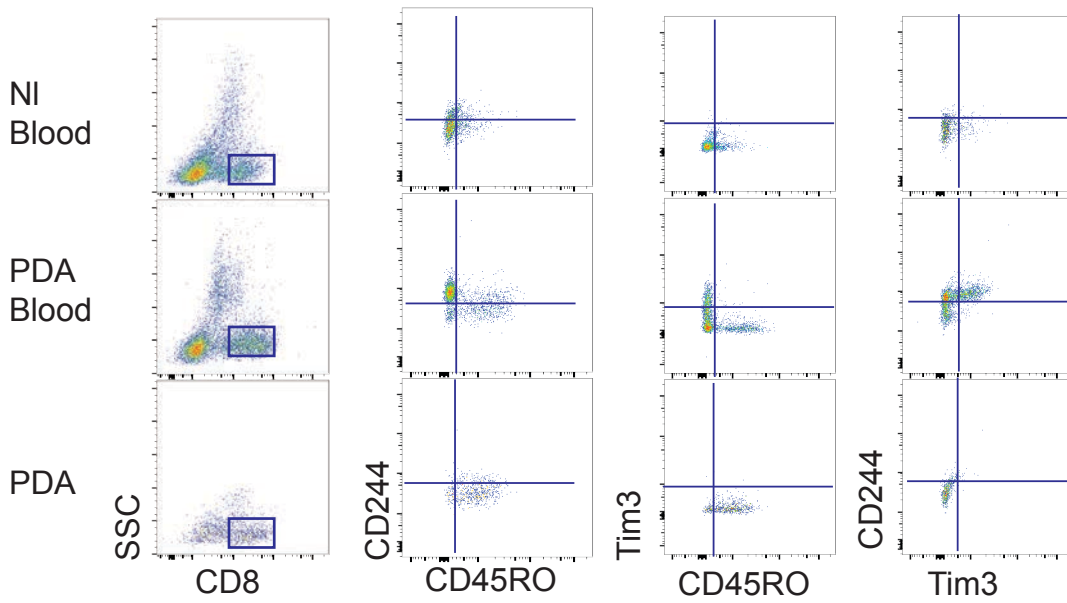

**Supplementary Figure 2.** Gating strategy for analyzing CD244 (2B4) and Tim3 expression on CD8 T cells in blood of normal individuals (NI), in blood of PDA patients (PDA blood) and in tumors. The far left panel is first gated on CD45<sup>+</sup> cells. The right three panels are gated on the CD8<sup>+</sup> T cell gate as shown.

**Supplementary Figure 3**

**A**

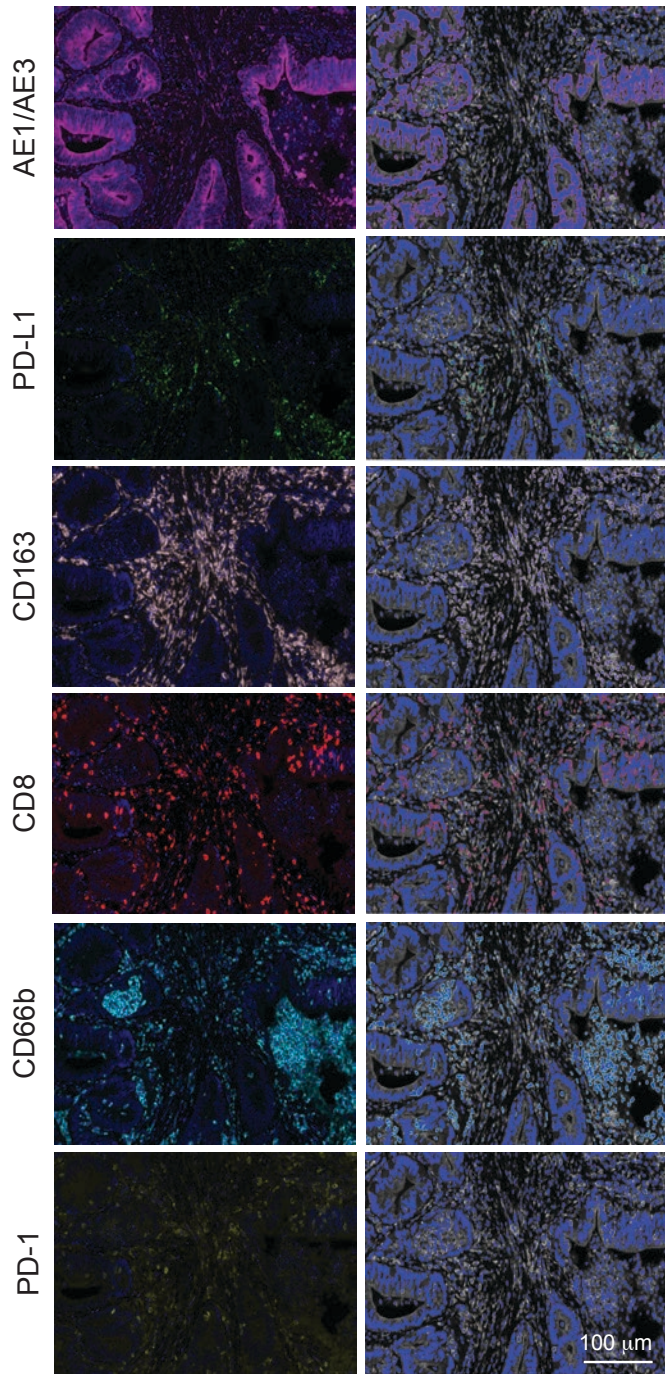

**B**

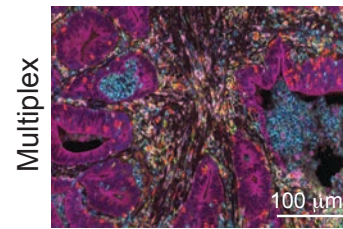

**Supplementary Figure 3.** Representative human PDA section stained with multiplex immunohistochemical panel. **A**, Individual antibody stains (left) and positive cell subsets outlined (right). **B**, Same image stamp from (A) with combined antibodies.

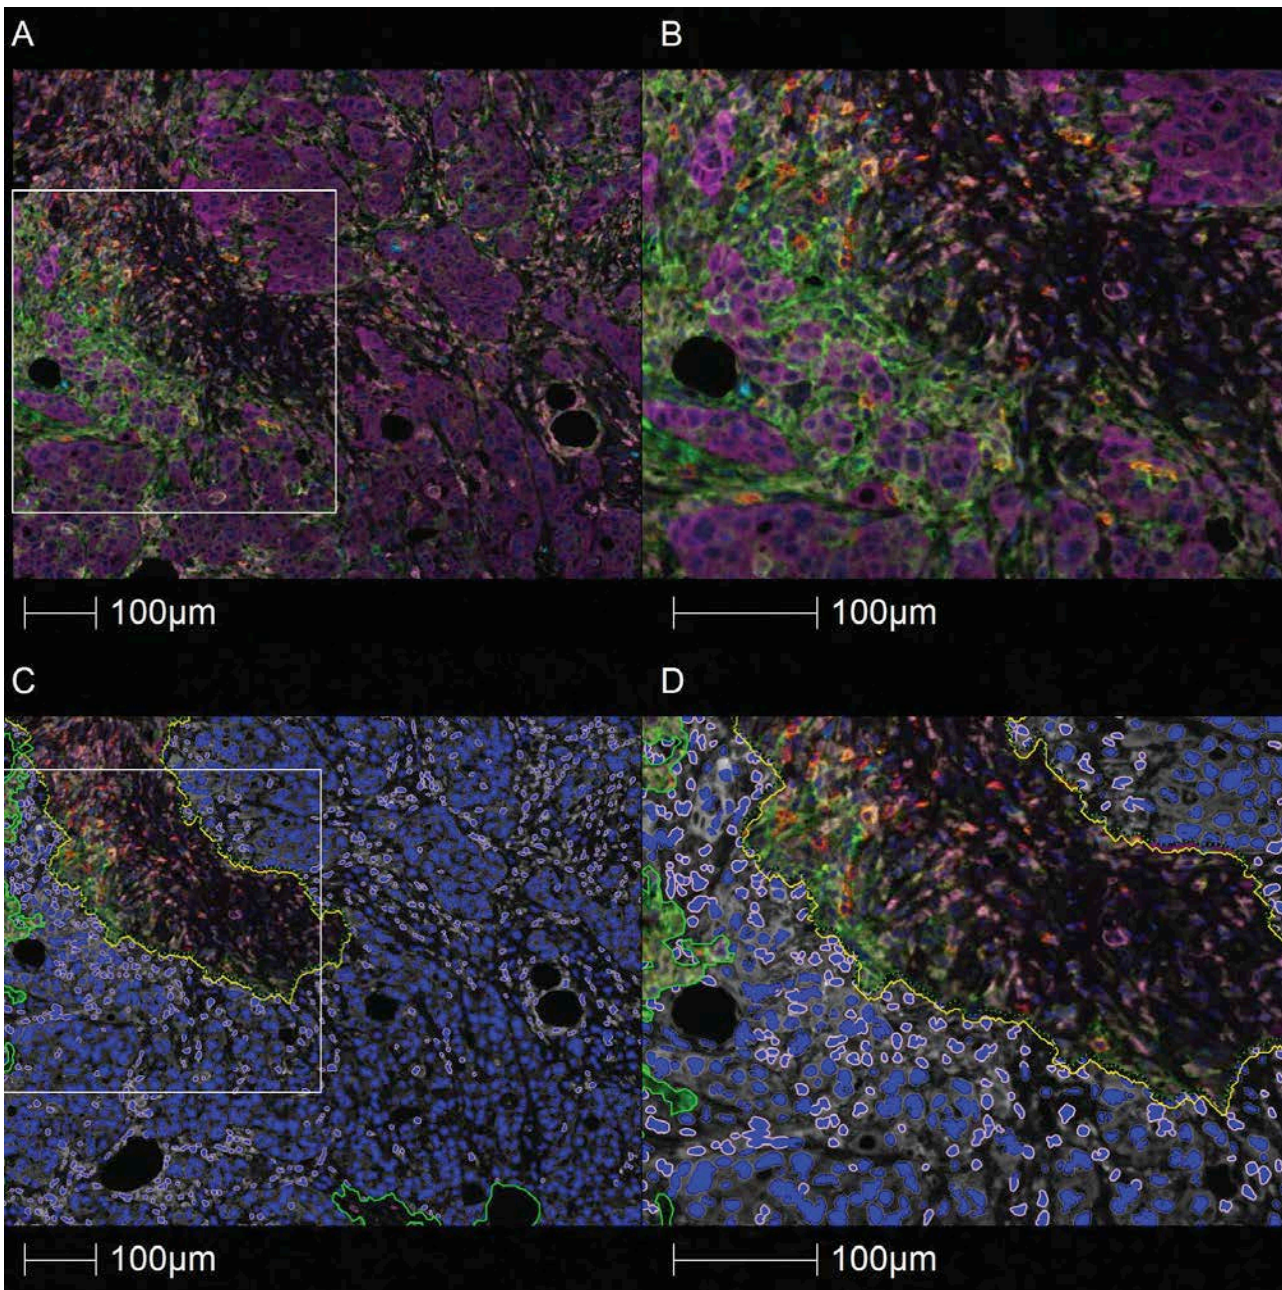

**Supplementary Figure 4.** Example of multiplex IHC analyses of human PDA using HALO software. Top row (**A, B**) shows representative staining of tumor cells (magenta), immune cells and PD-L1 (green). Bottom row (**C, D**) stromal and tumor regions outlined and cell numbers quantified. Tumor cell nuclei are shown in blue. Light pink outlines PD-L1<sup>+</sup> cells.

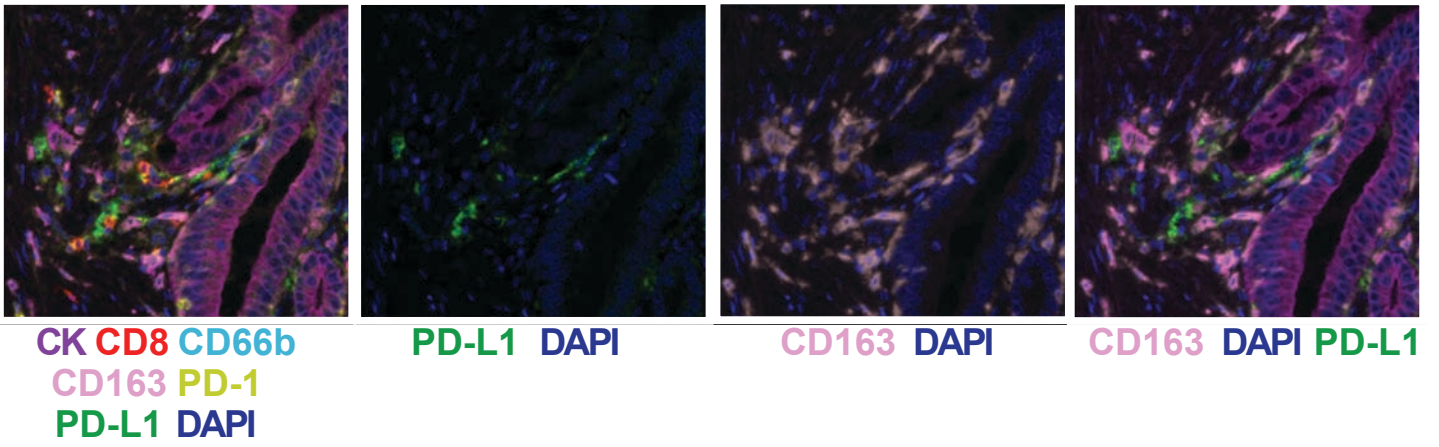

**Supplementary Figure 5.** PD-L1<sup>+</sup> stromal cells in PDA include CD163<sup>+</sup> macrophages (Figure 6A) as well as an additional CD163<sup>-</sup> cell subset shown here.

**Supplementary Table 1.** Antibodies used for tissue multiplex in Figure 6.

| <b>Position</b> | <b>Antibody</b> | <b>Clone/Host</b> | <b>Company</b> | <b>Concentration</b> | <b>OPAL Fluor</b> |
|-----------------|-----------------|-------------------|----------------|----------------------|-------------------|
| 1               | CD8             | 144B/Mouse        | DAKO           | 0.2 µg/ml            | 540               |
| 2               | CD66b           | G10F5/Mouse       | BD Biosciences | 1.25 µg/ml           | 520               |
| 3               | PD-1            | D4W2J/Rabbit      | Cell Signaling | 0.06 µg/ml           | 570               |
| 4               | PD-L1           | E1L3N/Rabbit      | Cell Signaling | 0.5 µg/ml            | 620               |
| 5               | CD163           | EP324/Rabbit      | Bio SB         | 0.25 µg/ml           | 650               |
| 6               | AE1/AE3         | AE1/AE3/Mouse     | DAKO           | 0.34 µg/ml           | 690               |

**Supplementary Table 2.** Patient characteristics.

| # <sup>1</sup> | Diagnosis | Differentiation Status/Grade | Stage           | Neoadjuvant                  | Survival (Days) | Cause of death          | TLS |
|----------------|-----------|------------------------------|-----------------|------------------------------|-----------------|-------------------------|-----|
| PC-1           | PDA       | Moderate                     | T3N1            | N                            | Alive           | Alive                   | Y   |
| PC-2           | PDA       | Poor                         | T1N1            | N                            | 864             | PDA                     | Y   |
| PC-3           | PDA       | Well                         | T3N0            | N                            | ND <sup>2</sup> | -                       | Y   |
| PC-4           | PDA       | Poor                         | T3N1            | N                            | 478             | Unknown                 | N   |
| PC-5           | PDA       | Well                         | T3N0            | N                            | ND              | -                       | Y   |
| PC-6           | PDA       | Moderate                     | T3N1            | N                            | 343             | Metastatic angiosarcoma | N   |
| PC-7           | PDA       | Well                         | T3N0            | N                            | ND              | -                       | N   |
| PC-8           | PDA       | Well                         | T2N1            | N                            | ND              | -                       | N   |
| PC-9           | PDA       | Poor                         | T3N0            | N                            | 702             | Unknown                 | N   |
| PC-10          | PDA       | Moderate                     | T3N1            | N                            | 696             | PDA                     | Y   |
| PC-11          | PDA       | Moderate                     | T3N1            | N                            | 1033            | Unknown                 | Y   |
| PC-12          | PDA       | Moderate                     | T3N1            | N                            | 626             | Unknown                 | Y   |
| PC-13          | PDA       | Moderate                     | T3N1            | N                            | 755             | Unknown                 | Y   |
| PC-14          | PDA       | Moderate                     | T3N0            | N                            | ND              | -                       | Y   |
| PC-15          | PDA       | Moderate                     | T3N0            | Y (Chemorads <sup>3</sup> )  | 983             | Unknown                 | N   |
| PC-16          | PDA       | Moderate                     | T3N0            | Y (Chemo <sup>4</sup> )      | ND              | -                       | Y   |
| PC-17          | PDA       | No PDA <sup>5</sup>          | NA <sup>6</sup> | Y (Chemorads)                | 624             | PDA                     | N   |
| PC-18          | PDA       | Moderate                     | T0N1            | Y (Folfinrox)                | 961             | PDA                     | N   |
| PC-19          | PDA       | Poor                         | T3N0            | Y (Folfinrox)                | ND              | -                       | N   |
| PC-20          | PDA       | Moderate                     | T2N0            | Y (Chemorads <sup>7</sup> )  | ND              | -                       | N   |
| PC-21          | PNET      | High                         | T2N1            | N                            | ND              | -                       | N   |
| PC-22          | PNET      | Low                          | T2N0            | Y (Chemo <sup>8</sup> )      | Alive           | Alive                   | N   |
| PC-23          | PNET      | Low                          | T2N1            | N                            | Alive           | Alive                   | N   |
| PC-24          | PNET      | Intermediate                 | T2N0            | N                            | ND              | -                       | N   |
| PC-25          | PNET      | Low                          | T3N0            | N                            | ND              | -                       | N   |
| PC-26          | PNET      | High <sup>9</sup>            | T3N1            | N                            | ND              | -                       | Y   |
| PC-27          | PNET      | Low                          | T3N1            | Y (Chemorads <sup>10</sup> ) | ND              | -                       | N   |

<sup>1</sup>Sample #PC1-PC9 correspond to the same tumors #PC1-PC9 as described in Supplementary Table 3

<sup>2</sup>ND, not determined

<sup>3</sup>Gemcitabine/Taxotere/Oxaliplatin/Capecitabine/XRT

<sup>4</sup>Gemcitabine/Taxotere/Capecitabine

<sup>5</sup>Pancreas with atrophy, fibrosis, dilated ducts, and residual islet cell islands

<sup>6</sup>NA, not applicable

<sup>7</sup>Folfinrox/Capecitabine/XRT

<sup>8</sup>Capecitabine /Temozolomide

<sup>9</sup>Mixed neuroendocrine and acinar features

<sup>10</sup>Capecitabine/XRT



**Supplementary Table 3.** TCR $\beta$  CDR3 sequence data in blood and tumors from PDA patients.

| <b>Sample</b> | <b>Tissue</b> | <b># Seq</b> | <b># Unique</b> | <b># Prod</b> | <b># Unique</b> | <b>% Prod</b> | <b>Entropy</b> | <b>Clonality</b> | <b>Max Freq (%)</b> |
|---------------|---------------|--------------|-----------------|---------------|-----------------|---------------|----------------|------------------|---------------------|
| PC-1          | Blood         | 22683        | 18915           | 17596         | 14718           | 77.6          | 13.56          | 0.02             | 0.69                |
| PC-2          | Blood         | 22616        | 16801           | 18317         | 13573           | 81.0          | 12.92          | 0.06             | 1.19                |
| PC-3          | Blood         | 34536        | 24286           | 28189         | 20166           | 81.6          | 12.64          | 0.12             | 7.91                |
| PC-4          | Blood         | 40341        | 19349           | 32245         | 15554           | 79.9          | 11.00          | 0.21             | 7.13                |
| PC-5          | Blood         | 55151        | 45949           | 45332         | 37807           | 82.2          | 14.84          | 0.02             | 0.42                |
| PC-6          | Blood         | 41850        | 35797           | 34637         | 29492           | 82.8          | 14.69          | 0.01             | 0.20                |
| PC-7          | Blood         | 257543       | 211787          | 205772        | 167410          | 79.9          | 16.23          | 0.06             | 3.13                |
| PC-1          | Tumor         | 9369         | 4572            | 7069          | 3402            | 75.5          | 10.49          | 0.11             | 2.31                |
| PC-2          | Tumor         | 8782         | 4069            | 7126          | 3264            | 81.1          | 10.31          | 0.12             | 2.74                |
| PC-3          | Tumor         | 1149         | 922             | 873           | 708             | 76.0          | 9.13           | 0.04             | 4.26                |
| PC-4          | Tumor         | 11053        | 8100            | 8705          | 6443            | 78.8          | 12.06          | 0.05             | 1.44                |
| PC-5          | Tumor         | 13490        | 7696            | 11145         | 6252            | 82.6          | 11.66          | 0.08             | 1.16                |
| PC-6          | Tumor         | 23728        | 11148           | 20217         | 9237            | 85.2          | 11.73          | 0.11             | 3.22                |
| PC-7          | Tumor         | 8095         | 5418            | 6226          | 4152            | 76.9          | 11.28          | 0.06             | 1.54                |
| PC-8          | Tumor         | 86957        | 14772           | 69736         | 11968           | 80.2          | 9.44           | 0.30             | 8.53                |
| PC-9          | Tumor         | 22738        | 7735            | 17322         | 5756            | 76.2          | 10.57          | 0.15             | 1.83                |

TCR $\beta$  CDR3 sequence data is located at Adaptive Biotechnologies immunoSEQ ANALYZER:

<https://clients.adaptivebiotech.com/pub/stromnes-2017-cancerimmunologyresearch>
